# Supplementary material
Source: PubMed Central journal article supplement (PMC3393369)
Supplement: supp_19.7.1027_CVI-CVI00194-12-s01.pdf [file supp_19.7.1027_CVI-CVI00194-12-s01.pdf]

**Table S1. Demographic information of healthy donors in this study**

| <b>ID #</b> | <b>Age (years)</b> | <b>Sex</b> | <b>Race</b> |
|-------------|--------------------|------------|-------------|
| 80          | 37                 | F          | WH          |
| 29          | 53                 | F          | WH          |
| 649         | 50                 | F          | HI          |
| 3339        | 34                 | M          | BL          |
| 4565        | 43                 | M          | Unk         |
| 4619        | 32                 | M          | PI          |
| 3242        | 66                 | M          | WH          |
| 4667        | 31                 | M          | WH          |
| 4954        | 34                 | F          | WH          |
| 5045        | 28                 | M          | WH          |
| 4701        | 40                 | M          | WH          |
| 4908        | 32                 | M          | AS          |
| 5020        | 55                 | F          | WH          |
| 5059        | 49                 | M          | WH          |
| 1347        | 53                 | M          | WH          |
| 4656        | 47                 | F          | WH          |
| 4987        | 51                 | M          | WH          |
| 5152        | 29                 | F          | WH          |
| 17WH        | 44                 | M          | WH          |
| 2980        | 44                 | M          | AS          |
| 4839        | 25                 | M          | WH          |
| 4964        | 25                 | F          | Unk         |
| 4597        | 36                 | F          | MR          |
| 4670        | 45                 | F          | AS          |
| 4906        | 42                 | M          | WH          |
| 4969        | 27                 | M          | MR          |
| 10WH        | 56                 | F          | WH          |
| 187WH       | 55                 | F          | WH          |
| 215         | 51                 | M          | WH          |
| 4593        | 30                 | F          | WH          |
| 4824        | 38                 | M          | WH          |
| 5131        | 26                 | F          | WH          |
| 4914        | 55                 | F          | HI          |
| 5018        | 25                 | F          | HI          |
| 4582        | 29                 | F          | WH          |
| 5223        | 33                 | M          | BL          |
| 4774        | 34                 | F          | WH          |

Abbreviations: White, WH; Hispanic, HI; Black, BL; Unknown, Unk; Pacific Islander, PI; Asian, AS; Multiple Races, MR.
