# Supplementary material
Source: PubMed Central journal article supplement (PMC3393369)
Supplement: supp_19.7.1027_CVI-CVI00194-12-s02.pdf [file supp_19.7.1027_CVI-CVI00194-12-s02.pdf]

**Table S2. Demographic and clinical data of HCV+ donors in this study**

| ID #   | Age | Sex | Race | MOI      | Gt  | VL*<br>(IU/mL) | VL*<br>(IU/mL) | Peak ALT<br>(IU/mL) | LOI<br>(years) | Fib<br>Score |
|--------|-----|-----|------|----------|-----|----------------|----------------|---------------------|----------------|--------------|
| PG0218 | 70  | F   | WH   | BT       | 3   | 3,230,000      | 4,500,000      | 245                 | 30             | 0            |
| 217    | 53  | M   | WH   | IDU      | 1b  | 63,400,000     | 6,500,000      | 133                 | 40             | 2            |
| 5078   | 56  | M   | Unk  | IDU, IC  | 1   | 3,090,000      | 2,500,000      | 197                 | 9              | CI           |
| 4730   | 55  | M   | WH   | BT       | 1a  | 16,700,000     | 6,250,000      | Unk                 | 20             | 3            |
| 5077   | 55  | M   | WH   | IDU      | 1a  | 2,520,000      | 2,500,000      | 185                 | 25             | 3            |
| 5088   | 48  | F   | WH   | Unk      | 1b  | 620            | Undetected     | 114                 | 30             | 1            |
| 5120   | 63  | F   | WH   | IDU      | 1a  | 848,390        | 650,000        | 125                 | Unk            | 2            |
| 5172   | 59  | M   | WH   | IDU      | 1   | 311,000        | 100,000        | 116                 | 15             | N/A          |
| 5031   | 57  | M   | WH   | MSP, IDU | 2b  | 1,380,000      | Undetected     | 994                 | 5              | N/A          |
| 5062   | 55  | M   | Unk  | MSP, IDU | 1b  | 5,000,000      | 6,500,000      | 73                  | 19             | CI           |
| 5178   | 52  | M   | WH   | IDU      | 2   | 2,520,000      | 650,000        | 133                 | 10             | 2            |
| 5119   | 57  | M   | HI   | IDU      | 1b  | 2,080,000      | 2,000,000      | 111                 | 10             | ESL          |
| 8423   | 56  | M   | WH   | BT       | Unk | 13,500,000     | 1,500,000      | 48                  | 40             | Unk          |
| 5175   | 46  | F   | WH   | Unk      | 1   | 2,090,000      | 2,000,000      | 46                  | Unk            | Unk          |
| 2473   | 51  | F   | WH   | BT       | 1a  | 1,250,000      | 1,200,000      | 41                  | 15             | Unk          |
| Br0218 | 27  | M   | WH   | ANS      | 1b  | 4,260,000      | 13,000,000     | 62                  | 27             | N/A          |
| JS0218 | 41  | M   | BL   | MFA      | 1a  | 3,310,000      | 1,000,000      | 76                  | 6              | N/A          |
| 3651   | 51  | F   | WH   | Unk      | 1b  | 2,500,000      | 1,300,000      | 270                 | Unk            | 1            |
| 7478   | 61  | F   | WH   | IDU      | 1   | 5,000,000      | 1,700,000      | 41                  | 9              | 1            |
| 9341   | 56  | M   | WH   | TA       | 1b  | 2,500,000      | 750,000        | 348                 | 30             | 2            |
| 3491   | 47  | M   | WH   | BT       | 1b  | 7,400,000      | 500,000        | 154                 | 25             | 3            |
| 5075   | 49  | M   | WH   | IC, TA   | 1a  | 3,330,000      | 2,500,000      | 62                  | 6              | 1            |
| 8091   | 61  | M   | WH   | IDU      | 1a  | 74,900         | 30,000         | Unk                 | 4              | CI           |
| 3895   | 61  | M   | WH   | Unk      | 1b  | 16,900         | Undetected     | 78                  | Unk            | CA           |
| 5122   | 42  | M   | IN   | DW       | 3   | 250,000        | 250,000        | 65                  | 40             | N/A          |
| 5128   | 61  | M   | WH   | BT       | 3   | 848,390        | 400,000        | 191                 | Unk            | N/A          |
| 5137   | 60  | F   | WH   | Unk      | 1a  | 7,000,000      | 600,000        | 121                 | Unk            | 1            |
| 5156   | 57  | M   | WH   | Unk      | 1b  | 167,000        | 150,000        | Unk                 | 35             | 3            |
| 5165   | 61  | M   | WH   | Unk      | 3a  | 169,000        | 150,000        | 371                 | 40             | N/A          |
| 5166   | 52  | M   | WH   | IDU      | 2   | 5,010,000      | 4,500,000      | 66                  | Unk            | 2            |
| 5931   | 63  | M   | WH   | Unk      | 1   | 5,790,000      | 500,000        | 87                  | 40             | 0            |
| 5160   | 58  | M   | WH   | IC       | 1b  | 899,000        | 1,000,000      | 147                 | 40             | 4            |
| 5170   | 39  | M   | HI   | MSP, IDU | 1a  | 337,000        | 300,000        | 159                 | 20             | 3            |
| 5176   | 63  | M   | WH   | IC       | 1a  | 167,000        | 1,150,000      | Unk                 | 20             | N/A          |
| 5174   | 47  | M   | WH   | Unk      | 1   | >5,000,000     | 16,000,000     | 215                 | 30             | N/A          |
| 5190   | 48  | F   | WH   | MSP, IDU | 1   | 322,000        | 300,000        | 88                  | 5              | N/A          |
| 5173   | 35  | F   | AS   | VT       | 6   | 4,000,000      | 800,000        | 366                 | 35             | 0            |
| 5218   | 64  | F   | WH   | IDU      | 2   | 9,840,000      | 1,000,000      | 46                  | 41             | N/A          |

Abbreviations: WH, White; Unk, Unknown; HI, Hispanic; BL, Black; IN, Indian; AS, Asian; MOI, Mode of Infection; BT, Blood Transfusion; IDU, Intravenous Drug Use; IC, Intranasal Cocaine; MSP, Mutiple Sex Partners; ANS, Accidental Needle Stick; MFA, Multiple Factor Administrations; TA, Tattoo/Body Piercing; DW, Dental Work; VT, Vertical Transmission; Gt, Genotype; VL, Viral Load; LOI, Length of Infection; Fib, Fibrosis; CI, Cirrhotic; N/A, Not Available; CA, Child's A Cirrhotic; ESL, End Stage Liver Disease. \* VL determined by The Scripps Clinic with blood drawn during earlier office visit; \* VL determined in-house with blood drawn for this study.
