# Supplementary material
Source: PubMed Central journal article supplement (PMC3393369)
Supplement: supp_19.7.1027_CVI-CVI00194-12-s03.pdf [file supp_19.7.1027_CVI-CVI00194-12-s03.pdf]

**Table S3. Flow cytometry analysis results to determine percent B cell subsets per total B cells and serum reactivity in healthy donors**

| ID #  | Percent |     |       |         |                 |         |         | Reactivity |       |
|-------|---------|-----|-------|---------|-----------------|---------|---------|------------|-------|
|       | Total B | IT  | Naïve | MZ-like | Tissue-like Mem | IgG mem | IgM mem | ANA        | dsDNA |
| 80WH  | 8.7     | 0.1 | 56.9  | 1.5     | 1.5             | 7.6     | 0.3     | /          | /     |
| 29    | 8.8     | 0.0 | 62.1  | 1.6     | 1.8             | 7.4     | 0.0     | /          | /     |
| 649   | 5.3     | 0.6 | 70.1  | 1.4     | 1.0             | 7.0     | 0.0     | /          | /     |
| 3339  | 4.0     | 0.2 | 30.0  | 1.3     | 1.8             | 13.7    | 0.0     | /          | /     |
| 4565  | 12.6    | 0.0 | 37.7  | 1.1     | 2.7             | 12.5    | 0.1     | /          | /     |
| 4619  | 16.1    | 0.2 | 40.4  | 0.2     | 3.2             | 5.3     | 0.3     | /          | /     |
| 3242  | 12.0    | 0.1 | 20.4  | 0.5     | 1.6             | 4.5     | 0.1     | /          | /     |
| 4667  | 11.3    | 1.3 | 10.7  | 0.3     | 0.7             | 9.5     | 1.2     | +          | /     |
| 4954  | 9.2     | 0.1 | 43.8  | 1.1     | 4.8             | 13.3    | 0.1     | /          | /     |
| 5045  | 9.3     | 0.0 | 20.7  | 1.3     | 3.5             | 9.5     | 0.0     | /          | /     |
| 4701  | 13.7    | 0.0 | 52.9  | 8.8     | 1.6             | 12.6    | 0.1     | /          | /     |
| 4908  | 11.5    | 0.2 | 62.4  | 0.4     | 0.6             | 4.4     | 0.7     | /          | /     |
| 5020  | 9.8     | 0.2 | 51.2  | 2.1     | 1.2             | 8.8     | 0.1     | /          | /     |
| 5059  | 15.0    | 0.1 | 48.6  | 4.2     | 1.3             | 2.2     | 0.2     | /          | /     |
| 5131  | 4.8     | 0.1 | 34.0  | 1.2     | 0.8             | 5.9     | 0.9     | /          | /     |
| 4656  | 5.9     | 0.1 | 58.0  | 1.1     | 1.4             | 7.8     | 0.8     | /          | /     |
| 4987  | 14.0    | 0.0 | 53.6  | 2.6     | 1.8             | 3.7     | 0.2     | /          | /     |
| 5152  | 8.0     | 0.0 | 53.4  | 2.5     | 1.7             | 12.6    | 0.2     | /          | /     |
| 17WH  | 9.8     | 0.1 | 62.3  | 3.7     | 2.0             | 5.1     | 0.3     | /          | /     |
| 2980  | 12.8    | 0.6 | 67.3  | 4.1     | 0.4             | 10.0    | 0.8     | /          | /     |
| 4839  | 7.1     | 0.1 | 49.4  | 2.2     | 0.3             | 14.0    | 0.6     | /          | /     |
| 4964  | 8.5     | 0.0 | 30.6  | 0.1     | 2.7             | 16.5    | 0.7     | /          | /     |
| 4597  | 7.8     | 0.3 | 69.8  | 1.6     | 7.3             | 11.8    | 0.1     | /          | /     |
| 4670  | 13.9    | 0.0 | 10.3  | 0.2     | 0.2             | 13.0    | 0.1     | /          | /     |
| 4906  | 14.2    | 0.2 | 77.4  | 1.9     | 0.3             | 17.8    | 0.7     | /          | /     |
| 4969  | 8.0     | 0.4 | 49.1  | 1.4     | 2.0             | 12.0    | 0.2     | /          | /     |
| 4774  | 6.6     | 0.1 | 55.5  | 1.3     | 0.4             | 4.2     | 1.4     | /          | /     |
| 187WH | 9.3     | 0.1 | 49.6  | 0.8     | 0.7             | 8.0     | 1.0     | /          | /     |
| 215   | 11.9    | 0.0 | 69.7  | 0.1     | 0.3             | 7.1     | 0.9     | /          | /     |
| 4593  | 10.0    | 0.5 | 78.0  | 0.9     | 1.2             | 18.0    | 1.1     | /          | /     |
| 4582  | 14.8    | 1.4 | 44.4  | 2.9     | 0.5             | 13.9    | 1.3     | /          | /     |
| 4824  | 9.6     | 1.3 | 57.1  | 2.8     | 0.6             | 17.5    | 0.8     | /          | /     |
| 5223  | 3.9     | 0.2 | 27.1  | 1.1     | 1.1             | 16.1    | 2.1     | /          | /     |
| 1347  | 8.3     | 0.1 | 70.5  | 1.9     | 0.8             | 19.4    | 2.2     | /          | /     |
| 4914  | 11.6    | 0.2 | 64.4  | 3.7     | 1.1             | 3.4     | 0.8     | /          | /     |
| 10WH  | 7.7     | 1.7 | 60.4  | 2.1     | 0.3             | 2.5     | 0.2     | /          | /     |
| 5018  | 8.1     | 0.2 | 54.0  | 2.0     | 2.1             | 19.7    | 1.8     | /          | /     |

/ = no reactivity and + = positive signal at 1/100 dilution (ANA) or OD405 signal above 0.5 (dsDNA)
