# Supplementary material
Source: PubMed Central journal article supplement (PMC3393369)
Supplement: supp_19.7.1027_CVI-CVI00194-12-s04.pdf [file supp_19.7.1027_CVI-CVI00194-12-s04.pdf]

**Table S4. Flow cytometry analysis results to determine percent B cell subsets per total B cells and serum reactivity in HCV+ donors**

| ID #   | Percent |     |       |         |                 |         |         | Reactivity |       |
|--------|---------|-----|-------|---------|-----------------|---------|---------|------------|-------|
|        | Total B | IT  | Naïve | MZ-like | Tissue-like Mem | IgG Mem | IgM Mem | ANA        | dsDNA |
| 5174   | 8.2     | 0.5 | 24.5  | 0.5     | 2.4             | 6.8     | 2.4     | +          | +     |
| Br0218 | 15.3    | 0.0 | 27.2  | 2.1     | 1.3             | 4.6     | 3.9     | +          | /     |
| JS0218 | 12.4    | 0.0 | 61.3  | 1.2     | 1.7             | 14.2    | 0.4     | /          | /     |
| 5088   | 10.9    | 0.5 | 41.6  | 5.2     | 3.2             | 13.4    | 0.6     | /          | /     |
| 8423   | 16.2    | 0.1 | 30.0  | 0.9     | 3.0             | 11.9    | 4.7     | /          | /     |
| 5077   | 8.1     | 0.3 | 21.6  | 1.4     | 4.8             | 5.4     | 0.5     | /          | +     |
| 4730   | 3.2     | 0.2 | 15.8  | 3.4     | 3.4             | 4.9     | 4.5     | +          | +     |
| 3651   | 5.2     | 0.1 | 55.0  | 3.3     | 3.8             | 6.7     | 3.8     | /          | /     |
| 5078   | 4.1     | 0.0 | 32.2  | 0.1     | 1.3             | 11.4    | 0.5     | /          | /     |
| 5120   | 16.2    | 0.0 | 40.7  | 4.2     | 2.9             | 4.7     | 3.1     | /          | /     |
| PG0218 | 10.0    | 2.6 | 21.8  | 2.6     | 0.8             | 7.8     | 2.7     | +          | +     |
| 5062   | 11.3    | 0.8 | 14.6  | 1.0     | 2.4             | 10.6    | 7.2     | +          | /     |
| 2473   | 10.9    | 0.3 | 24.0  | 0.0     | 0.6             | 10.6    | 2.4     | /          | /     |
| 5031   | 4.1     | 0.4 | 11.5  | 0.0     | 4.8             | 4.0     | 1.8     | /          | /     |
| 3491   | 14.1    | 0.1 | 20.0  | 2.2     | 1.0             | 5.8     | 8.0     | +          | /     |
| 5075   | 4.5     | 1.4 | 41.7  | 3.2     | 4.0             | 15.3    | 1.6     | /          | /     |
| 8091   | 5.9     | 0.0 | 43.2  | 1.0     | 1.7             | 12.1    | 0.4     | /          | /     |
| 3895   | 8.3     | 0.7 | 43.8  | 3.5     | 1.6             | 21.0    | 3.9     | +          | /     |
| 217    | 9.6     | 0.1 | 60.7  | 0.2     | 0.1             | 14.6    | 6.7     | +          | +     |
| 5122   | 13.2    | 0.0 | 26.5  | 0.8     | 0.0             | 18.0    | 0.1     | /          | /     |
| 5128   | 5.5     | 0.1 | 33.9  | 6.5     | 0.1             | 15.4    | 0.3     | /          | /     |
| 5137   | 5.2     | 0.1 | 33.3  | 2.2     | 2.5             | 14.7    | 0.1     | /          | /     |
| 5156   | 9.2     | 0.2 | 75.7  | 0.9     | 0.1             | 15.2    | 3.4     | /          | /     |
| 5165   | 15.5    | 0.1 | 65.9  | 1.7     | 0.8             | 8.1     | 0.2     | /          | /     |
| 5166   | 9.2     | 0.1 | 78.3  | 1.0     | 1.5             | 17.7    | 5.4     | /          | /     |
| 5931   | 3.9     | 0.1 | 58.8  | 1.7     | 3.0             | 14.5    | 0.1     | /          | /     |
| 5160   | 15.0    | 0.3 | 31.0  | 0.1     | 1.6             | 5.6     | 4.3     | /          | /     |
| 5170   | 5.8     | 0.2 | 32.6  | 0.2     | 1.5             | 5.9     | 2.2     | /          | /     |
| 5172   | 5.4     | 0.2 | 31.3  | 3.8     | 0.6             | 6.1     | 0.8     | /          | /     |
| 5176   | 11.4    | 0.5 | 26.5  | 0.8     | 0.9             | 7.7     | 1.3     | /          | /     |
| C119   | 9.0     | 0.5 | 48.4  | 1.2     | 0.3             | 15.7    | 0.3     | /          | /     |
| 5178   | 13.8    | 0.0 | 11.0  | 1.0     | 2.2             | 16.6    | 0.0     | /          | /     |
| 9341   | 13.5    | 0.0 | 28.1  | 2.0     | 1.0             | 18.9    | 0.8     | /          | /     |
| 7478   | 20.8    | 0.1 | 22.6  | 0.4     | 4.3             | 19.7    | 1.4     | /          | /     |
| 5175   | 12.9    | 0.3 | 28.9  | 0.1     | 2.4             | 4.5     | 0.8     | /          | /     |
| 5190   | 3.9     | 0.4 | 43.8  | 0.7     | 2.2             | 3.2     | 0.4     | /          | /     |
| 5173   | 6.3     | 0.4 | 11.3  | 0.3     | 2.2             | 7.3     | 1.2     | /          | /     |
| 5218   | 13.2    | 0.2 | 54.9  | 3.9     | 3.4             | 8.8     | 0.2     | /          | /     |

/ = no reactivity and + = positive signal at 1/100 dilution (ANA) or OD405 signal above 0.5 (dsDNA)
