# Supplementary material
Source: PubMed Central journal article supplement (PMC3393369)
Supplement: supp_19.7.1027_CVI-CVI00194-12-s05.pdf [file supp_19.7.1027_CVI-CVI00194-12-s05.pdf]

Table S5. Ig characteristics of IgM memory B cells of healthy donors

| Clone #   | VH   | DH   | JH | V # of mut | % mut | CDR3 (aa)             | Length | Net Charge |
|-----------|------|------|----|------------|-------|-----------------------|--------|------------|
| 6491C2H   | 3-23 | 2-15 | 4  | 5          | 1.7   | DLIVGGY               | 7      | -1         |
| 6491C3H   | 3-49 | 3-21 | 3  | 0          | 0.0   | EMLGSTF               | 7      | -1         |
| 6491D2H   | 3-30 | 4-19 | 6  | 2          | 0.7   | ADEEL                 | 5      | -3         |
| 6491D10H  | 3-15 | 6-19 | 4  | 3          | 1.0   | DTVRGGQCEL            | 10     | -1         |
| 6491B3H   | 4-34 | 6-13 | 4  | 4          | 1.0   | GTVSSQYY              | 9      | 0          |
| 6491B6H   | 4-34 | 2-15 | 3  | 4          | 1.0   | GTVRLDD               | 7      | -1         |
| 6491C3H   | 3-15 | 6-19 | 3  | 3          | 1.7   | DTVRGGQCV             | 9      | 0          |
| 6492B3H   | 4-61 | 6-19 | 3  | 3          | 1.7   | DGPGGG                | 6      | -1         |
| 6492D2H   | 3-7  | 5-12 | 3  | 1          | 0.3   | GNYDFWS               | 7      | -1         |
| 6492E9H   | 1-69 | 3-3  | 4  | 10         | 2.0   | SPGAYDDFWSGYYAY       | 15     | -2         |
| 50591B5H  | 3-48 | 3-3  | 3  | 1          | 0.3   | GRGFCSGHT             | 9      | +2         |
| 50591B8H  | 3-23 | 2-2  | 6  | 3          | 1.0   | DTVGIL                | 6      | -1         |
| 50591C4H  | 4-59 | 5-16 | 3  | 5          | 1.7   | GLSGLPY               | 7      | 0          |
| 50591C7H  | 4-61 | 6-19 | 3  | 4          | 1.0   | WAGRWLVVCF            | 10     | +1         |
| 50591D4H  | 3-48 | 3-16 | 4  | 6          | 2.4   | DEWGETTEASGY          | 12     | -4         |
| 50591E9H  | 3-33 | 2-21 | 3  | 2          | 0.7   | DTVGGQCSL             | 9      | -1         |
| 50591E10H | 1-69 | 3-22 | 4  | 2          | 1.0   | ETIEITVL              | 8      | -2         |
| 50591F11H | 3-74 | 6-14 | 5  | 3          | 1.0   | SPVLGLTNAAA           | 11     | 0          |
| 50591G9H  | 5-51 | 6-19 | 4  | 3          | 1.0   | IQLQISC               | 8      | +1         |
| 50591G8H  | 5-a  | 4-17 | 3  | 2          | 0.7   | QTSPAA                | 6      | 0          |
| 51531D5H  | 3-30 | 2-21 | 4  | 1          | 0.3   | DPQVGGSPDY            | 11     | -2         |
| 51531D6H  | 3-23 | 3-15 | 5  | 0          | 0.0   | DTVRGSCEPEG           | 11     | -2         |
| 51531E3H  | 4-34 | 3-23 | 4  | 2          | 0.7   | GTVRAPRAD             | 9      | +1         |
| 51531F6H  | 4-61 | 2-21 | 3  | 2          | 0.7   | DTMHQGPGLPPGA         | 14     | -1         |
| 51532B5H  | 3-53 | 3-15 | 4  | 0          | 0.0   | RPWAA                 | 5      | +1         |
| 51532C9H  | 4-34 | 4-17 | 5  | 2          | 0.7   | SGALLQEHL             | 9      | 0          |
| 51531G6H  | 3-30 | 2-15 | 4  | 5          | 1.7   | DGC                   | 3      | -1         |
| 51531G7H  | 5-1  | 5-16 | 3  | 1          | 0.3   | FWRSAPGAED            | 10     | -1         |
| WH102E2H  | 3-33 | 2-15 | 4  | 0          | 0.0   | DLALD                 | 5      | -2         |
| WH102E4H  | 3-11 | 2-21 | 3  | 3          | 1.0   | GGTRTLRSAFDI          | 13     | +1         |
| WH103C3H  | 3-33 | 3-3  | 3  | 3          | 1.0   | DTVRGGYNT             | 9      | 0          |
| WH103D4H  | 1-18 | 1-26 | 4  | 3          | 1.0   | DAGKRSSGVTSGSYYRD     | 17     | +1         |
| WH104B3H  | 4-59 | 1-26 | 5  | 3          | 1.0   | YLLQWENTG             | 9      | -1         |
| WH104B4H  | 3-33 | 2-21 | 3  | 5          | 1.7   | DLALD                 | 5      | -2         |
| WH104B8H  | 4-59 | 2-21 | 3  | 2          | 0.7   | GLVLEDYYSLV           | 11     | -2         |
| WH104D7H  | 3-15 | 3-3  | 6  | 4          | 1.4   | DPPNFWSGYYGEYYYYYGMDV | 21     | -3         |
| WH104E4H  | 3-11 | 6-13 | 4  | 7          | 2.4   | VGSIAAAGTYDY          | 12     | -1         |
| WH104G2H  | 3-48 | 4-11 | 6  | 1          | 0.3   | DTVVDG                | 5      | -2         |
| WH104G8H  | 3-23 | 2-21 | 4  | 8          | 2.0   | MQLTGRDWFYD           | 11     | -1         |
| 17WH1B8H  | 3-33 | 2-21 | 3  | 2          | 0.7   | DLALDAFDI             | 9      | -3         |
| 17WH1B9H  | 3-33 | 4-17 | 5  | 5          | 1.7   | DTDYADSWSSL           | 11     | -3         |
| 17WH1C3H  | 3-23 | 2-21 | 4  | 2          | 0.7   | MQLTGW                | 6      | 0          |
| 17WH1C10H | 3-30 | 2-21 | 4  | 3          | 1.0   | DPQVGGSPDY            | 11     | -2         |
| 17WH1D3H  | 4-34 | 4-23 | 2  | 2          | 1.0   | GRYYTVV               | 7      | +1         |
| 17WH1D5H  | 1-69 | 5-15 | 1  | 5          | 1.4   | VFGAGDRSSALCTS        | 15     | 0          |
| 17WH1D6H  | 4-61 | 6-19 | 5  | 2          | 0.7   | DGPGGGWFKSA           | 11     | 0          |
| 17WH1E6H  | 3-7  | 3-16 | 3  | 0          | 0.0   | LGEAIQA               | 7      | -1         |
| 17WH1F8H  | 4-30 | 3-16 | 4  | 1          | 0.3   | TPGAGSGSW             | 9      | 0          |
| 17WH1G9H  | 4-61 | 3-15 | 4  | 2          | 0.7   | DTQPLPRS              | 8      | 0          |
| 51312C3H  | 4-59 | 3-15 | 1  | 2          | 0.7   | TGAGSGEAF             | 9      | -1         |
| 51312C6H  | 3-1  | 4-15 | 4  | 5          | 1.7   | DTVEGRS               | 7      | -1         |
| 51312C8H  | 3-11 | 6-13 | 4  | 1          | 0.3   | VGSIAAAGTYDY          | 12     | -1         |
| 51312C9H  | 3-23 | 5-16 | 2  | 2          | 0.7   | DLIVGGYGSG            | 10     | -1         |
| 51312D5H  | 4-30 | 7-15 | 1  | 3          | 1.0   | YNPGYSSTHYLI          | 13     | +1         |
| 51312G2H  | 3-48 | 3-9  | 3  | 3          | 1.0   | GHC GGSTCDSLERTFDI    | 17     | -1         |
| 51312G4H  | 3-74 | 4-17 | 4  | 6          | 1.7   | HSPSVAKLV             | 9      | +2         |
