# Supplementary material
Source: PubMed Central journal article supplement (PMC3393369)
Supplement: supp_19.7.1027_CVI-CVI00194-12-s06.pdf [file supp_19.7.1027_CVI-CVI00194-12-s06.pdf]

Table S6. Ig characteristics of IgM memory B cells in HCV donors

| Clone #    | VH   | DH   | JH | V # of mut | % mut | CDR3 (aa)               | Length | Net Charge |
|------------|------|------|----|------------|-------|-------------------------|--------|------------|
| 50771B8H   | 4-39 | 6-19 | 4  | 2          | 0.7   | LMALAW                  | 8      | +1         |
| 50771C8H   | 3-66 | 6-19 | 2  | 3          | 1.0   | DFQNG                   | 5      | -1         |
| 50771C9H   | 3-30 | 1-26 | 5  | 7          | 2.4   | DFQNGRSRPDY             | 11     | +1         |
| 50771D5H   | 3-30 | 1-26 | 4  | 3          | 1.0   | DAQVGRSYPDY             | 11     | -1         |
| 50771E3H   | 3-30 | 6-19 | 3  | 4          | 1.7   | VSGTRSSF                | 8      | +1         |
| 50771E9H   | 4-59 | 2-8  | 4  | 7          | 1.7   | GLSGLSYLATGAS           | 14     | 0          |
| 50771G4H   | 3-21 | 2-21 | 5  | 3          | 0.7   | ACGGDCDN                | 8      | -2         |
| 50774C4H   | 4-30 | 4-11 | 4  | 4          | 1.3   | GKISTYQFY               | 9      | +1         |
| 50774C7H   | 4-34 | 3-10 | 3  | 2          | 0.7   | KGDYYGAGSFI             | 11     | 0          |
| 50774C9H   | 4-30 | 5-12 | 4  | 3          | 0.7   | VYNPGYS                 | 6      | 0          |
| 50774D8H   | 3-21 | 2-15 | 4  | 7          | 2.4   | GEWDILAVVGLGFDY         | 15     | -3         |
| 50774D10H  | 1-69 | 3-9  | 4  | 5          | 1.4   | LGDILTGYQ               | 9      | -1         |
| 50774G4H   | 5-a  | 3-16 | 4  | 2          | 0.7   | QMGGSGSPRYHF            | 13     | +2         |
| 50774G5H   | 1-18 | 1-26 | 4  | 2          | 1.0   | DAGAKV                  | 6      | 0          |
| 50774G10H  | 4-39 | 5-12 | 4  | 1          | 0.3   | HVEVVASWD               | 9      | -1         |
| 50881C11H  | 3-23 | 2-21 | 4  | 4          | 1.4   | DARGFDRPFY              | 11     | 0          |
| 50881D10H  | 3-64 | 6-13 | 4  | 3          | 1.0   | DDRGTIAAA               | 9      | -1         |
| 50881E2H   | 3-30 | 1-26 | 4  | 6          | 1.4   | DGQVLGSLHDN             | 11     | 0          |
| 50881E6H   | 3-7  | 5-24 | 1  | 2          | 0.7   | VDGHNSRH                | 8      | +2         |
| 50882F5H   | 4-59 | 2-21 | 4  | 4          | 1.3   | SAYCGDCYIEY             | 12     | -2         |
| 50881F10H  | 3-30 | 1-26 | 4  | 2          | 0.7   | GGREGASYD               | 9      | -1         |
| 50882D5H   | 3-30 | 2-15 | 4  | 4          | 1.4   | DGCSGGSCYHFDY           | 13     | -1         |
| 50882G5H   | 1-69 | 3-15 | 2  | 2          | 0.7   | VFGAGDRSSA              | 11     | 0          |
| 50882G6H   | 3-7  | 5-24 | 1  | 1          | 0.3   | VDGHNSRH                | 8      | +2         |
| 51743E3H   | 3-23 | 2-15 | 5  | 9          | 4.1   | RYSSAGFDP               | 9      | 0          |
| 51743E7H   | 3-11 | 3-10 | 4  | 6          | 2.0   | GVRGAGTKDYHN            | 12     | +2         |
| 51743F7H   | 3-11 | 3-19 | 5  | 8          | 2.4   | GSGSWNKGLR              | 10     | +2         |
| 51744B6H   | 3-30 | 4-11 | 5  | 17         | 5.4   | DQHGDYRAKFW             | 11     | +1         |
| 51744C6H   | 3-7  | 6-19 | 4  | 5          | 1.7   | DTVDSSS                 | 7      | -2         |
| 51744E4H   | 3-53 | 3-22 | 5  | 8          | 2.0   | GGDSSGYLGPKWFAA         | 15     | 0          |
| 51744G4H   | 3-30 | 2-2  | 4  | 6          | 1.7   | DGPVTYCIR               | 9      | 0          |
| 51743E5H   | 4-34 | 3-14 | 3  | 6          | 2.0   | ALLPLVRLVLKGR           | 14     | +3         |
| 51743E6H   | 3-48 | 3-16 | 4  | 19         | 3.4   | ATLQSVY                 | 7      | 0          |
| 51743E8H   | 3-30 | 5-16 | 2  | 10         | 2.7   | ARDEEFWVGLVRGGARKPDS    | 21     | -1         |
| PG02181E2H | 3-11 | 6-13 | 4  | 10         | 2.0   | GGIAAAGTYDYKSR          | 14     | +1         |
| PG02181E4H | 3-15 | 3-3  | 6  | 12         | 4.5   | GGPHYDFS                | 7      | 0          |
| PG02181F2H | 3-30 | 6-13 | 4  | 7          | 2.0   | VSGAWDSTWYLKLIRY        | 16     | +1         |
| PG02181F4H | 4-59 | 7-27 | 5  | 12         | 3.8   | GLSGLPYL                | 9      | 0          |
| PG02181F5H | 3-49 | 3-16 | 1  | 14         | 4.7   | GGREGASPKYFFDH          | 15     | +1         |
| PG02181F6H | 3-23 | 1-7  | 2  | 10         | 3.8   | DSRAGTTFLGRVVNKIW       | 17     | +1         |
| PG02181F7H | 3-30 | 2-15 | 3  | 7          | 4.8   | DIAGGAFNRYHII           | 13     | +1         |
| PG02182F5H | 3-30 | 6-13 | 3  | 17         | 5.7   | VSGAWDSTWYLTRKQVQKV     | 19     | +2         |
| PG02182F6H | 3-30 | 3-10 | 3  | 6          | 2.5   | VSGAWKR                 | 7      | +2         |
| PG02182F3H | 3-48 | 4-17 | 4  | 12         | 3.1   | DRPQSFSLSSPVTIPSTMH     | 19     | +1         |
| 47303B7H   | 1-69 | 2-21 | 4  | 12         | 4.0   | VFGAGDRSSW              | 10     | +1         |
| 47301C10H  | 3-64 | 6-13 | 4  | 14         | 4.7   | LSSQSRSHRGGAFDY         | 15     | +2         |
| 47303C7H   | 1-69 | 3-3  | 4  | 16         | 5.4   | SPGAYNVFRSGYYAY         | 15     | +1         |
| 47303HD8   | 3-23 | 6-19 | 6  | 8          | 2.4   | GVELYSSGWYGYWYHYHYGMDVR | 24     | 0          |
| 47304B2H   | 4-59 | 4-11 | 6  | 11         | 3.8   | VISQYSNSPAYYGKGG        | 16     | +1         |
| 47304B6H   | 3-30 | 6-19 | 4  | 17         | 4.8   | DLALDAFGIRVWHS          | 14     | 0          |
| 47304B8H   | 4-34 | 4-23 | 2  | 11         | 3.8   | GRYTVVTH                | 9      | 2          |
| 47304D8H   | 3-23 | 3-10 | 4  | 12         | 3.8   | EGGSYSHLTGRSFVDC        | 16     | 0          |
| 2171B8H    | 4-39 | 2-8  | 4  | 17         | 5.7   | LMASGYHAGY              | 10     | +1         |
| 2171C9H    | 3-48 | 1-26 | 4  | 11         | 4.1   | DFWEVL                  | 6      | -2         |
| 2171C10H   | 3-66 | 6-19 | 4  | 7          | 3.4   | AVTSTGWYNK              | 10     | +1         |
| 2171D3H    | 3-48 | 3-9  | 3  | 15         | 5.3   | GHCGGSTCDSLERTFHI       | 17     | +2         |
| 2172G2H    | 3-33 | 3-16 | 3  | 16         | 5.5   | WGTFGHGFRS              | 10     | +2         |
| 2172E5H    | 3-23 | 3-3  | 4  | 12         | 4.5   | MQLTAPDWFTKSM LVY       | 16     | -1         |
| 2172B11H   | 3-48 | 1-14 | 4  | 11         | 3.9   | SRKTAGSVDY              | 10     | +2         |
| 2173D4H    | 4-30 | 1-7  | 1  | 14         | 4.7   | LQPRISRTTRFYHI          | 14     | +4         |
| 2172D8H    | 3-53 | 3-22 | 5  | 13         | 4.0   | GGDSSGYLWFAA            | 12     | -1         |

/ = no reactivity and + = positive signal at 1/100 dilution (ANA) or OD405 signal above 0.5 (dsDNA); NT= not tested
